# Supplementary material for: Impact of Horse Grazing on Floristic Diversity in Mediterranean Small Standing-Water Ecosystems (SWEs)
Source: MDPI journal article supplement (doi:10.3390/plants11121597), 2022-06-17
Supplement: s1 [file s1]

## Supplementary Materials

**Table S1.** – Biological, chorological, and ecological types of the vascular plants surveyed in the SWEs investigated. Abbreviations: tw= specialist of temporary ponds, gen= generalist of wet habitats, ter= opportunistic terrestrial species.

| Taxon                                                                    | Biological type | Chorological type      | Ecological type |
|--------------------------------------------------------------------------|-----------------|------------------------|-----------------|
| <i>Alisma plantago-aquatica</i> L.                                       | I rad           | Subcosmop.             | gen             |
| <i>Alopecurus bulbosus</i> Gouan subsp. <i>bulbosus</i>                  | H caesp         | Euri-Medit.-Subatl.    | gen             |
| <i>Baldellia ranunculoides</i> (L.) Parl.                                | I rad           | Medit.-Atlant.         | gen             |
| <i>Callitriche brutia</i> Petagna                                        | I rad           | Subatlant.             | gen             |
| <i>Callitriche stagnalis</i> Scop.                                       | I rad           | Eurasiat.              | gen             |
| <i>Cynosurus polybracteatus</i> Poir.                                    | T scap          | Steno-Medit.-Occid.    | ter             |
| <i>Cyperus badius</i> Desf.                                              | G rhiz          | Paleo-Subtropic.       | gen             |
| <i>Eleocharis palustris</i> (L.) Roem. & Schult. subsp. <i>palustris</i> | G rhiz          | Subcosmop.             | gen             |
| <i>Eryngium corniculatum</i> Lam.                                        | H bienn         | Medit.-Occid.          | tw              |
| <i>Eudianthe laeta</i> Rchb. ex Willk.                                   | T scap          | SW-Medit.              | tw              |
| <i>Glyceria notata</i> Chevall.                                          | I rad           | Subcosmop.             | gen             |
| <i>Helosciadium crassipes</i> W.D.J.Koch ex Rchb.                        | I rad           | Steno-Medit.           | tw              |
| <i>Hordeum marinum</i> Huds.                                             | T scap          | Euri-Medit.-Occid.     | tw              |
| <i>Illecebrum verticillatum</i> L.                                       | T. scap         | Sub-Atlant.            | ter             |
| <i>Isolepis cernua</i> (Vahl) Roem. & Schult.                            | T scap          | Subcosmop.             | tw              |
| <i>Juncus bufonius</i> L.                                                | T caesp         | Cosmop.                | tw              |
| <i>Juncus effusus</i> L.                                                 | H caesp         | Cosmop.                | gen             |
| <i>Juncus fontanesii</i> J. Gay                                          | G rhiz          | Paleo-Subtropic.       | gen             |
| <i>Juncus hybridus</i> Brot.                                             | T caesp         | Medit.-Atlant.         | tw              |
| <i>Juncus pygmaeus</i> Rich. ex Thuill.                                  | T caesp         | Medit.-Atlant.         | tw              |
| <i>Juncus subnodulosus</i> Schrank                                       | G rhiz          | Europ.-Caucas.         | gen             |
| <i>Juncus tenageja</i> Ehrh.                                             | T caesp         | Paleotemp.             | tw              |
| <i>Juncus tingitanus</i> Maire & Weiller                                 | T caesp         | Steno-Medit.-Occid.    | tw              |
| <i>Kickxia cirrhosa</i> (L.) Fritsch                                     | T scap          | Steno-Medit.           | tw              |
| <i>Limniris pseudacorus</i> (L.) Fuss                                    | G rhiz          | Eurasiat. Temp.        | gen             |
| <i>Linum usitatissimum</i> L.                                            | T scap          | Coltiv. E subspont.    | ter             |
| <i>Lythrum hyssopifolia</i> L.                                           | T scap          | Subcosmop.             | ter             |
| <i>Mentha pulegium</i> L. subsp. <i>pulegium</i>                         | H scap          | Subcosmop.             | tw              |
| <i>Myosotis gussoni</i> Jan                                              | T scap          | N-Medit. (Euri-)       | tw              |
| <i>Myriophyllum verticillatum</i> L.                                     | I rad           | Circumbor.             | gen             |
| <i>Nasturtium officinale</i> R.Br.                                       | H scap          | Cosmop.                | gen             |
| <i>Oenanthe silaifolia</i> M.Bieb.                                       | H scap          | Medit.-Atlant.         | gen             |
| <i>Phalaris coerulescens</i> Desf                                        | H caesp         | Steno-Medit.-Macarones | ter             |
| <i>Plantago coronopus</i> L.                                             | T scap          | Euri-Medit.            | ter             |
| <i>Polypogon maritimus</i> Willd. subsp. <i>maritimus</i>                | T scap          | Steno-Medit.-Macarones | ter             |
| <i>Ranunculus ophioglossifolius</i> Vill.                                | T scap          | Euri-Medit.            | tw              |
| <i>Ranunculus paludosus</i> Poir.                                        | H scap          | Steno-Medit.-Turan.    | ter             |
| <i>Ranunculus sardous</i> Crantz                                         | T scap          | Euri-Medit.            | gen             |
| <i>Samolus valerandi</i> L.                                              | H scap          | Subcosmop.             | gen             |
| <i>Teesdalia coronopifolia</i> (J.P. Bergeret) Thell.                    | T scap          | Euri-Medit.            | ter             |
| <i>Trifolium resupinatum</i> L.                                          | H rept          | (W)-Paleotemp.         | ter             |
| <i>Veronica anagalloides</i> Guss.                                       | H scap          | Euri-Medit.            | tw              |

**Table S2.** - Mean cover scores for the vascular flora in groups of plots sorted by size and treatment. Abbreviations: tw= specialist of temporary ponds, gen= generalist of wet habitats, ter= opportunistic terrestrial species.

|                                                                          | SIZE  |       | TREATMENT   |           |                |
|--------------------------------------------------------------------------|-------|-------|-------------|-----------|----------------|
|                                                                          | Small | Large | Undisturbed | Disturbed | Over-disturbed |
| <i>Alisma plantago-aquatica</i> L.                                       | 0.00  | 1.00  | 0.00        | 0.00      | 1.00           |
| <i>Alopecurus bulbosus</i> Gouan subsp. <i>bulbosus</i>                  | 1.00  | 0.00  | 1.00        | 0.00      | 0.00           |
| <i>Baldellia ranunculoides</i> (L.) Parl.                                | 1.42  | 1.17  | 1.42        | 1.33      | 1.00           |
| <i>Callitriche brutia</i> Petagna                                        | 1.00  | 0.00  | 1.00        | 0.00      | 0.00           |
| <i>Callitriche stagnalis</i> Scop.                                       | 1.75  | 0.00  | 1.75        | 0.00      | 0.00           |
| <i>Cynosurus polybracteatus</i> Poir.                                    | 0.00  | 0.00  | 0.00        | 0.00      | 0.00           |
| <i>Cyperus badius</i> Desf.                                              | 1.00  | 1.00  | 1.00        | 0.00      | 1.00           |
| <i>Eleocharis palustris</i> (L.) Roem. & Schult. subsp. <i>palustris</i> | 1.48  | 1.33  | 1.48        | 1.43      | 1.00           |
| <i>Eryngium corniculatum</i> Lam.                                        | 0.00  | 0.00  | 0.00        | 0.00      | 0.00           |
| <i>Eudianthe laeta</i> Rchb. ex Willk.                                   | 1.91  | 0.00  | 1.91        | 0.00      | 0.00           |
| <i>Glyceria notata</i> Chevall.                                          | 1.40  | 1.00  | 1.40        | 1.00      | 0.00           |
| <i>Helosciadium crassipes</i> W.D.J.Koch ex Rchb.                        | 1.65  | 2.42  | 1.65        | 2.89      | 1.00           |
| <i>Hordeum marinum</i> Huds.                                             | 0.00  | 0.00  | 0.00        | 0.00      | 0.00           |
| <i>Illecebrum verticillatum</i> L.                                       | 1.00  | 1.00  | 1.00        | 1.00      | 1.00           |
| <i>Isolepis cernua</i> (Vahl) Roem. & Schult.                            | 1.00  | 0.00  | 1.00        | 0.00      | 0.00           |
| <i>Juncus bufonius</i> L.                                                | 1.00  | 1.00  | 1.00        | 1.00      | 0.00           |
| <i>Juncus effusus</i> L.                                                 | 0.00  | 1.00  | 0.00        | 1.00      | 0.00           |
| <i>Juncus fontanesii</i> J. Gay                                          | 0.00  | 0.00  | 0.00        | 0.00      | 0.00           |
| <i>Juncus hybridus</i> Brot.                                             | 0.00  | 0.00  | 0.00        | 0.00      | 0.00           |
| <i>Juncus pygmaeus</i> Rich. ex Thuill.                                  | 1.00  | 0.00  | 1.00        | 0.00      | 0.00           |
| <i>Juncus subnodulosus</i> Schrank                                       | 0.00  | 0.00  | 0.00        | 0.00      | 0.00           |
| <i>Juncus tenageja</i> Ehrh.                                             | 0.00  | 0.00  | 0.00        | 0.00      | 0.00           |
| <i>Juncus tingitanus</i> Maire & Weiller                                 | 1.00  | 0.00  | 1.00        | 0.00      | 0.00           |
| <i>Kickxia cirrhosa</i> (L.) Fritsch                                     | 0.00  | 0.00  | 0.00        | 0.00      | 0.00           |
| <i>Limniris pseudacorus</i> (L.) Fuss                                    | 1.00  | 1.00  | 1.00        | 1.00      | 0.00           |
| <i>Linum usitatissimum</i> L.                                            | 0.00  | 0.00  | 0.00        | 0.00      | 0.00           |
| <i>Lythrum hyssopifolia</i> L.                                           | 0.00  | 0.00  | 0.00        | 0.00      | 0.00           |
| <i>Mentha pulegium</i> L. subsp. <i>pulegium</i>                         | 3.00  | 1.00  | 3.00        | 1.00      | 1.00           |
| <i>Myosotis gussoni</i> Jan.                                             | 0.00  | 0.00  | 0.00        | 0.00      | 0.00           |
| <i>Myriophyllum verticillatum</i> L.                                     | 1.21  | 1.00  | 1.21        | 1.00      | 0.00           |
| <i>Nasturtium officinale</i> R.Br.                                       | 1.33  | 0.00  | 1.33        | 0.00      | 0.00           |
| <i>Oenanthe silaifolia</i> M.Bieb.                                       | 0.00  | 1.00  | 0.00        | 1.00      | 0.00           |
| <i>Phalaris coerulescens</i> Desf                                        | 0.00  | 0.00  | 0.00        | 0.00      | 0.00           |
| <i>Plantago coronopus</i> L.                                             | 0.00  | 0.00  | 0.00        | 0.00      | 0.00           |
| <i>Polypogon maritimus</i> Willd. subsp. <i>maritimus</i>                | 0.00  | 0.00  | 0.00        | 0.00      | 0.00           |
| <i>Ranunculus ophioglossifolius</i> Vill.                                | 1.00  | 0.00  | 1.00        | 0.00      | 0.00           |
| <i>Ranunculus paludosus</i> Poir.                                        | 1.00  | 0.00  | 1.00        | 0.00      | 0.00           |
| <i>Ranunculus sardous</i> Crantz                                         | 1.00  | 1.00  | 1.00        | 1.00      | 0.00           |
| <i>Samolus valerandi</i> L.                                              | 0.00  | 0.00  | 0.00        | 0.00      | 0.00           |
| <i>Teesdalia coronopifolia</i> (J.P. Bergeret) Thell.                    | 0.00  | 0.00  | 0.00        | 0.00      | 0.00           |
| <i>Trifolium resupinatum</i> L.                                          | 0.00  | 0.00  | 0.00        | 0.00      | 0.00           |
| <i>Veronica anagalloides</i> Guss.                                       | 0.00  | 0.00  | 0.00        | 0.00      | 0.00           |

**Table S3.** – Location and characteristics of plots in the study area.

| Plot code | SWEs Size | Latitude      | Longitude    |
|-----------|-----------|---------------|--------------|
| 1         | Small     | 39°45'45.55"N | 8°56'47.06"E |
| 2         | Small     | 39°45'45.70"N | 8°56'47.47"E |
| 3         | Small     | 39°45'45.77"N | 8°56'47.68"E |
| 4         | Small     | 39°45'45.91"N | 8°56'47.76"E |
| 5         | Small     | 39°45'46.33"N | 8°56'43.92"E |
| 6         | Small     | 39°45'46.68"N | 8°56'44.05"E |
| 7         | Small     | 39°45'46.26"N | 8°56'46.05"E |

|    |       |               |              |
|----|-------|---------------|--------------|
| 8  | Small | 39°45'46.50"N | 8°56'46.78"E |
| 9  | Small | 39°45'43.30"N | 8°57'9.04"E  |
| 10 | Small | 39°45'43.27"N | 8°57'9.15"E  |
| 11 | Small | 39°45'43.17"N | 8°57'9.22"E  |
| 12 | Small | 39°45'43.09"N | 8°57'9.19"E  |
| 13 | Small | 39°45'43.00"N | 8°57'9.10"E  |
| 14 | Small | 39°45'42.95"N | 8°57'9.03"E  |
| 15 | Small | 39°45'43.09"N | 8°57'8.99"E  |
| 16 | Small | 39°45'43.21"N | 8°57'8.93"E  |
| 17 | Small | 39°45'44.11"N | 8°57'8.68"E  |
| 18 | Small | 39°45'43.97"N | 8°57'8.84"E  |
| 19 | Small | 39°45'43.88"N | 8°57'8.95"E  |
| 20 | Small | 39°45'44.53"N | 8°57'8.28"E  |
| 21 | Small | 39°45'44.57"N | 8°57'8.43"E  |
| 22 | Small | 39°45'44.42"N | 8°57'8.61"E  |
| 23 | Small | 39°45'43.85"N | 8°57'9.40"E  |
| 24 | Small | 39°45'43.82"N | 8°57'9.61"E  |
| 25 | Small | 39°45'44.11"N | 8°57'9.57"E  |
| 26 | Large | 39°45'40.35"N | 8°57'1.02"E  |
| 27 | Large | 39°45'39.80"N | 8°57'0.63"E  |
| 28 | Large | 39°45'38.44"N | 8°56'59.39"E |
| 29 | Large | 39°45'38.39"N | 8°56'58.55"E |
| 30 | Large | 39°45'43.42"N | 8°56'52.53"E |
| 31 | Large | 39°45'37.72"N | 8°56'58.55"E |
| 32 | Large | 39°45'43.05"N | 8°56'52.29"E |
| 33 | Large | 39°45'42.69"N | 8°56'52.06"E |
| 34 | Large | 39°45'46.19"N | 8°56'55.76"E |
| 35 | Large | 39°45'47.97"N | 8°56'56.51"E |
| 36 | Large | 39°45'47.64"N | 8°56'57.30"E |
| 37 | Large | 39°45'46.35"N | 8°56'58.38"E |
| 38 | Large | 39°45'45.43"N | 8°56'58.55"E |
| 39 | Large | 39°45'44.30"N | 8°56'59.09"E |
| 40 | Large | 39°45'43.52"N | 8°57'0.70"E  |
| 41 | Large | 39°45'42.55"N | 8°57'1.62"E  |
| 42 | Large | 39°45'41.51"N | 8°57'1.76"E  |
| 43 | Large | 39°45'36.60"N | 8°56'58.09"E |
| 44 | Large | 39°45'35.96"N | 8°56'57.76"E |
| 45 | Large | 39°45'34.90"N | 8°56'56.48"E |
| 46 | Large | 39°45'34.85"N | 8°56'56.25"E |
| 47 | Large | 39°45'36.05"N | 8°56'54.76"E |
| 48 | Large | 39°45'37.26"N | 8°56'53.73"E |
| 49 | Large | 39°45'39.33"N | 8°56'52.88"E |
| 50 | Large | 39°45'39.65"N | 8°56'52.84"E |
